# Supplementary material for: Intensive Environmental Surveillance Plan for Listeria monocytogenes in Food Producing Plants and Retail Stores of Central Italy: Prevalence and Genetic Diversity
Source: MDPI journal article supplement (doi:10.3390/foods10081944), 2021-08-20
Supplement: s1 [file s1]

**Table S1.** Abbreviation list.

| <b>Abbreviation</b> | <b>Explenation</b>                       |
|---------------------|------------------------------------------|
| FPE                 | Food processing environment              |
| FPP                 | Food producing plants                    |
| RS                  | Retail store                             |
| FBO                 | Food business operators                  |
| RTE                 | Ready-to-eat                             |
| WGS                 | Whole genome sequencing                  |
| MLST                | Multilocus sequencing typing             |
| cgMLST              | Core genome multilocus sequencing typing |
| MST                 | Minimum spanning tree                    |
