# Supplementary material for: Intensive Environmental Surveillance Plan for Listeria monocytogenes in Food Producing Plants and Retail Stores of Central Italy: Prevalence and Genetic Diversity
Source: MDPI journal article supplement (doi:10.3390/foods10081944), 2021-08-20
Supplement: s1 [file s1]

**Table S3.** Positive samples and *Lm* strains' molecular typing results for each production FPP and RS.

| Food processing plant/retail store<br>P ID | Positive samples (%) <sup>a</sup> | Typed strains | Serogroup  | ST       | CC       |
|--------------------------------------------|-----------------------------------|---------------|------------|----------|----------|
| FPP1                                       | 6/15 (40%)                        | 6             | IIb        | 191      | 191      |
| FPP2                                       | 7/15 (47%)                        | 7             | IIb        | 3        | 3        |
| FPP3                                       | 1/11 (9%)                         | 1             | IVb        | 1        | 1        |
| <b>FPP4</b>                                | <b>1/15 (7%)</b>                  | <b>1</b>      | <b>IIa</b> | <b>7</b> | <b>7</b> |
| FPP5                                       | 2/15 (13%)                        | 2             | IIa        | 121      | 121      |
| FPP6                                       | 5/15 (33%)                        | 5             | IIa        | 121      | 121      |
|                                            |                                   | 1             | IIb        | 517      | 517      |
| FPP7                                       | 1/13 (7%)                         | 1             | IVb        | 1        | 1        |
| FPP8                                       | 1/15 (7%)                         | 1             | SNT        | SNT      | SNT      |
| FPP9                                       | 1/15 (7%)                         | 1             | IVb        | 1        | 1        |
| FPP10                                      | 2/15 (13%)                        | 2             | IIb        | 517      | 517      |
| FPP11                                      | 1/15 (7%)                         | 1             | IVb        | 6        | 6        |
| FPP12                                      | 1/15 (7%)                         | 1             | IIc        | 9        | 9        |
| FPP13                                      | 1/15 (7%)                         | 1             | IIa        | 121      | 121      |
| FPP14                                      | 1/15 (7%)                         | 1             | IIa        | 121      | 121      |
| FPP15                                      | 1/15 (7%)                         | 1             | IIc        | 9        | 9        |
| FPP16                                      | 12/15 (80%)                       | 12            | IIa        | 121      | 121      |
| FPP17                                      | 3/15 (20%)                        | 3             | IIc        | 9        | 9        |
| FPP18                                      | 2/15 (13%)                        | 1             | IIa        | 14       | 14       |
|                                            |                                   | 1             | IIb        | 429      | 429      |
| FPP19                                      | 4/15 (27%)                        | 4             | IIc        | 9        | 9        |
| FPP20                                      | 2/15 (13%)                        | 2             | IIc        | 9        | 9        |
| FPP21                                      | 2/15 (13%)                        | 1             | IIc        | 9        | 9        |
|                                            |                                   | 2             | IIa        | 121      | 121      |
| FPP22                                      | 3/15 (20%)                        | 1             | IVb        | 1        | 1        |
|                                            |                                   | 2             | IIb        | 3        | 3        |
| FPP23                                      | 1/15 (7%)                         | 1             | IIc        | 9        | 9        |
| FPP24                                      | 3/15 (20%)                        | 3             | IIc        | 9        | 9        |
| FPP25                                      | 8/15 (53%)                        | 1             | IIb        | 3        | 3        |
|                                            |                                   | 8             | IIc        | 9        | 9        |
| RS1                                        | 1/15 (7%)                         | 1             | IIa        | 121      | 121      |
| RS2                                        | 2/15 (13%)                        | 1             | IVb        | 1        | 1        |
|                                            |                                   | 1             | IIa        | 121      | 121      |
| RS3                                        | 6/15 (40%)                        | 6             | IVb        | 1        | 1        |
| RS4                                        | 5/15 (33%)                        | 1             | IIb        | 3        | 3        |
|                                            |                                   | 1             | IIa        | 121      | 121      |
|                                            |                                   | 2             | IIa        | 8        | 8        |
|                                            |                                   | 1             | IIa        | 101      | 101      |
| RS5                                        | 1/15 (7%)                         | 1             | IVb        | 2        | 2        |
| RS6                                        | 1/15 (7%)                         | 1             | IIa        | 91       | 14       |

|             |                   |          |            |          |          |
|-------------|-------------------|----------|------------|----------|----------|
| RS7         | 1/15 (7%)         | 1        | IIa        | 8        | 8        |
| RS8         | 2/15 (13%)        | 2        | IVb        | 2        | 2        |
| RS9         | 1/7 (14%)         | 1        | IIa        | 2764     | 2764     |
| <b>RS10</b> | <b>1/15 (7%)</b>  | <b>1</b> | <b>IIa</b> | <b>7</b> | <b>7</b> |
| RS11        | 3/12 (25%)        | 2        | IIb        | 363      | 363      |
|             |                   | 1        | IIb        | 224      | 224      |
| RS12        | 3/15 (20%)        | 1        | IIa        | 325      | 31       |
|             |                   | 2        | IVb        | 1        | 1        |
| <b>RS13</b> | <b>3/16 (19%)</b> | 1        | IIc        | 9        | 9        |
|             |                   | <b>2</b> | <b>IIa</b> | <b>7</b> | <b>7</b> |
| RS14        | 5/15 (33%)        | 2        | IIb        | 3        | 3        |
|             |                   | 1        | IIa        | 7        | 7        |
|             |                   | 1        | IIa        | 504      | 475      |
|             |                   | 1        | IIa        | 121      | 121      |
| RS15        | 1/15 (7%)         | 1        | IVb        | 1        | 1        |
| RS16        | 2/15 (13%)        | 3        | IIa        | 121      | 121      |
| RS17        | 1/15 (7%)         | 1        | IIb        | 3        | 3        |
| RS18        | 1/15 (7%)         | 1        | IIa        | 325      | 31       |
| RS19        | 3/15 (20%)        | 1        | IIa        | 325      | 31       |
|             |                   | 1        | IIa        | 155      | 155      |
|             |                   | 1        | IIa        | 121      | 121      |
| RS20        | 2/15 (13%)        | 1        | IIa        | 325      | 31       |
|             |                   | 1        | IIc        | 9        | 9        |
| RS21        | 1/15 (7%)         | 1        | IIa        | 325      | 31       |

ST-sequence type. CC-clonal complex. a: environmental samples positive for *Lm* compared to the total samples tested. Strains belonging to the outbreak clone are in bold font. SNT- strain not typed: the bacterial strain was not available for further genomic analysis other than serogroup. [UW1]
