# Supplementary material for: Intensive Environmental Surveillance Plan for Listeria monocytogenes in Food Producing Plants and Retail Stores of Central Italy: Prevalence and Genetic Diversity
Source: MDPI journal article supplement (doi:10.3390/foods10081944), 2021-08-20
Supplement: s1 [file s1]

**Table S4.** Positive samples and molecular typing results for *Lm* isolated during the follow-up sampling.

| Food processing<br>plant/retail store<br>ID | Typed<br>isolates | Serogroup  | ST       | CC       |
|---------------------------------------------|-------------------|------------|----------|----------|
| FPP6                                        | 2                 | IIa        | 121      | 121      |
|                                             | 1                 | IVb        | 1        | 1        |
| FPP11                                       | 1                 | IVb        | 6        | 6        |
| FPP17                                       | 1                 | IIc        | 9        | 9        |
| FPP18                                       | 1                 | IIc        | 9        | 9        |
| RS4                                         | 1                 | IIa        | 121      | 121      |
| RS6                                         | 1                 | IIa        | 14       | 91       |
| <b>RS13</b>                                 | 1                 | IVb        | 2        | 2        |
|                                             | <b>1</b>          | <b>IIa</b> | <b>7</b> | <b>7</b> |
|                                             | 2                 | IIc        | 9        | 9        |

ST-sequence type. CC-clonal complex. Strains belonging to the outbreak clone are in bold font.
