# Supplementary material for: Intensive Environmental Surveillance Plan for Listeria monocytogenes in Food Producing Plants and Retail Stores of Central Italy: Prevalence and Genetic Diversity
Source: MDPI journal article supplement (doi:10.3390/foods10081944), 2021-08-20
Supplement: s1 [file s1]

**Table S5.** Quality control check of sequence data. Reads' quality control metrics reported are after trimming.

| Strain ID          | Sequence ID            | Average read quality score | N° read pairs | Vertical coverage | N° contigs | Total length (bp) | N50       | L50 |
|--------------------|------------------------|----------------------------|---------------|-------------------|------------|-------------------|-----------|-----|
| Lm_1958            | 2016.TE.10956.1.10.fsa | 32.1                       | 4,013,638     | 118               | 65         | 2,967,331         | 489,281   | 3   |
| Lm_1959            | 2016.TE.10956.1.11.fsa | 31.79                      | 2,872,928     | 92                | 59         | 3,017,215         | 510,825   | 3   |
| Lm_1960            | 2016.TE.10956.1.12.fsa | 32.7                       | 4,052,512     | 169               | 167        | 2,977,541         | 524,626   | 2   |
| Lm_1961            | 2016.TE.10956.1.13.fsa | 31.86                      | 2,182,764     | 67                | 52         | 2,983,122         | 508,735   | 2   |
| Lm_1962            | 2016.TE.10956.1.14.fsa | 32.4                       | 2,715,462     | 115               | 119        | 3,025,935         | 516,315   | 2   |
| Lm_1963            | 2016.TE.10956.1.15.fsa | 31.97                      | 2,229,538     | 37                | 176        | 3,007,080         | 489,058   | 2   |
| Lm_1964            | 2016.TE.10956.1.16.fsa | 32.18                      | 1,945,568     | 81                | 82         | 3,019,088         | 516,602   | 2   |
| Lm_1967            | 2016.TE.10956.1.19.fsa | 32.27                      | 3,115,196     | 133               | 168        | 3,028,288         | 579,539   | 3   |
| Lm_1968            | 2016.TE.10956.1.20.fsa | 31.79                      | 1,952,728     | 60                | 214        | 2,943,512         | 48,265    | 17  |
| Lm_1969            | 2016.TE.10956.1.25.fsa | 32.48                      | 3,931,966     | 167               | 159        | 3,038,424         | 489,317   | 3   |
| Lm_1970            | 2016.TE.10956.1.26.fsa | 32.11                      | 4,806,552     | 137               | 49         | 2,935,177         | 449,383   | 2   |
| Lm_1974            | 2016.TE.10956.1.36.fsa | 31.61                      | 2,259,980     | 72                | 63         | 2,974,292         | 268,528   | 3   |
| Lm_1975            | 2016.TE.10956.1.37.fsa | 32.11                      | 2,255,916     | 94                | 95         | 2,895,712         | 510,943   | 2   |
| Lm_1976            | 2016.TE.10956.1.38.fsa | 32.26                      | 2,034,124     | 85                | 504        | 3,096,610         | 483,057   | 3   |
| Lm_1977            | 2016.TE.10956.1.39.fsa | 32.18                      | 2,338,262     | 96                | 131        | 3,093,756         | 431,753   | 3   |
| Lm_1954            | 2016.TE.10956.1.40.fsa | 32.1                       | 2,270,532     | 96                | 81         | 2,931,423         | 1,507,844 | 1   |
| Lm_1948            | 2016.TE.10956.1.41.fsa | 32.25                      | 2,787,522     | 117               | 129        | 3,068,386         | 526,076   | 2   |
| Lm_1949            | 2016.TE.10956.1.42.fsa | 32.29                      | 2,498,646     | 106               | 145        | 3,038,436         | 517,91    | 2   |
| Lm_1950            | 2016.TE.10956.1.43.fsa | 32.24                      | 2,190,292     | 91                | 197        | 3,109,352         | 438,891   | 4   |
| Lm_1951            | 2016.TE.10956.1.44.fsa | 33.46                      | 949,4         | 31                | 114        | 3,065,689         | 64,672    | 15  |
| Lm_1952            | 2016.TE.10956.1.45.fsa | 32.39                      | 3,005,852     | 128               | 153        | 3,124,487         | 481,686   | 3   |
| Lm_1971            | 2016.TE.10956.1.46.fsa | 32.31                      | 2,519,256     | 95                | 75         | 3,049,803         | 449,54    | 4   |
| Lm_1953            | 2016.TE.10956.1.47.fsa | 32.32                      | 2,685,800     | 114               | 110        | 2,924,335         | 580,305   | 2   |
| Lm_1978            | 2016.TE.10956.1.48.fsa | 32.23                      | 2,467,484     | 104               | 94         | 2,968,632         | 479,534   | 3   |
| Lm_1980            | 2016.TE.10956.1.49.fsa | 32.23                      | 2,307,802     | 97                | 112        | 3,112,802         | 474,812   | 3   |
| Lm_1979            | 2016.TE.10956.1.51.fsa | 32.29                      | 2,463,636     | 105               | 107        | 3,025,717         | 257,394   | 3   |
| Lm_1957            | 2016.TE.10956.1.9.fsa  | 32.09                      | 3,161,934     | 89                | 64         | 3,011,702         | 507,416   | 3   |
| 2016.TE.12907.1.33 | 2016.TE.12907.1.33.fsa | 34.4                       | 5,305,850     | 196               | 53         | 3,060,351         | 465,251   | 4   |
| 2016.TE.12907.1.34 | 2016.TE.12907.1.34.fsa | 33.7                       | 2,626,610     | 117               | 57         | 3,061,472         | 481,622   | 3   |
| Lm_2001            | 2016.TE.15639.1.13.fsa | 33.06                      | 3,363,790     | 145               | 97         | 3,109,823         | 358,803   | 4   |
| Lm_2029            | 2016.TE.15639.1.17.fsa | 33.66                      | 1,440,170     | 51                | 67         | 3,092,990         | 236,795   | 5   |
| Lm_2028            | 2016.TE.15639.1.18.fsa | 32.95                      | 3,250,534     | 142               | 72         | 3,098,833         | 302,516   | 3   |
| 2016.TE.15639.1.26 | 2016.TE.15639.1.26.fsa | 33.48                      | 3,938,672     | 157               | 95         | 2,948,386         | 449,383   | 2   |
| Lm_2017            | 2016.TE.15639.1.28.fsa | 33.71                      | 5,612,492     | 206               | 116        | 2,993,205         | 546,52    | 3   |
| Lm_2030            | 2016.TE.15639.1.31.fsa | 33.7                       | 2,269,562     | 81                | 38         | 3,008,710         | 517,925   | 2   |
| Lm_2032            | 2016.TE.15639.1.32.fsa | 33.73                      | 2,012,494     | 73                | 56         | 3,092,090         | 302,516   | 4   |
| Lm_2031            | 2016.TE.15639.1.33.fsa | 33.71                      | 3,892,974     | 139               | 58         | 3,094,072         | 302,516   | 4   |
| Lm_2034            | 2016.TE.15639.1.34.fsa | 33.78                      | 3,776,486     | 132               | 43         | 3,053,607         | 518,041   | 2   |

|                    |                        |       |           |     |     |           |         |   |
|--------------------|------------------------|-------|-----------|-----|-----|-----------|---------|---|
| Lm_2042            | 2016.TE.15639.1.35.fsa | 32.94 | 2,896,316 | 129 | 69  | 3,063,850 | 510,936 | 2 |
| Lm_2002            | 2016.TE.15639.1.5.fsa  | 33.03 | 3,842,786 | 159 | 85  | 3,070,489 | 581,263 | 2 |
| Lm_2003            | 2016.TE.15639.1.6.fsa  | 33.13 | 2,423,078 | 105 | 75  | 3,103,422 | 358,803 | 4 |
| Lm_2033            | 2016.TE.16633.1.2.fsa  | 33.83 | 4,901,730 | 159 | 70  | 3,060,119 | 518,062 | 2 |
| Lm_2058            | 2016.TE.17371.1.10.fsa | 34.01 | 1,392,426 | 54  | 61  | 3,016,064 | 509,792 | 3 |
| Lm_2060            | 2016.TE.17371.1.11.fsa | 34.15 | 1,377,960 | 47  | 71  | 3,012,509 | 260,686 | 4 |
| 2016.TE.17371.1.18 | 2016.TE.17371.1.18.fsa | 34.17 | 4,834,256 | 185 | 59  | 3,023,196 | 518,148 | 2 |
| Lm_2050            | 2016.TE.17371.1.2.fsa  | 34.11 | 1,218,070 | 47  | 66  | 2,961,586 | 511,505 | 3 |
| Lm_2051            | 2016.TE.17371.1.3.fsa  | 34.27 | 4,162,334 | 146 | 60  | 2,928,885 | 604,997 | 2 |
| Lm_2052            | 2016.TE.17371.1.4.fsa  | 34.08 | 1,365,764 | 52  | 48  | 2,965,550 | 489,274 | 3 |
| Lm_2053            | 2016.TE.17371.1.5.fsa  | 34.14 | 1,378,382 | 51  | 46  | 2,964,998 | 564,627 | 3 |
| Lm_2054            | 2016.TE.17371.1.6.fsa  | 34.3  | 4,067,056 | 142 | 66  | 2,976,457 | 565,717 | 3 |
| Lm_2055            | 2016.TE.17371.1.7.fsa  | 34.17 | 2,240,044 | 83  | 37  | 3,013,890 | 511,857 | 3 |
| Lm_2056            | 2016.TE.17371.1.8.fsa  | 34.3  | 2,647,480 | 93  | 41  | 3,005,661 | 477,264 | 3 |
| Lm_2057            | 2016.TE.17371.1.9.fsa  | 33.88 | 3,070,536 | 131 | 104 | 3,023,172 | 476,54  | 3 |
| Lm_2091            | 2016.TE.20838.1.22.fsa | 34.03 | 1,234,212 | 49  | 34  | 3,006,776 | 476,139 | 3 |
| Lm_2092            | 2016.TE.20838.1.23.fsa | 33.74 | 2,416,166 | 108 | 75  | 3,017,832 | 605,869 | 2 |
| Lm_2070            | 2016.TE.20838.1.3.fsa  | 33.6  | 3,982,536 | 167 | 75  | 3,029,069 | 361,235 | 3 |
| Lm_2069            | 2016.TE.20838.1.4.fsa  | 34.23 | 4,080,212 | 150 | 59  | 3,045,587 | 435,205 | 4 |
| Lm_1854            | 2016.TE.6891.1.78.fsa  | 33.45 | 2,067,704 | 69  | 53  | 3,018,896 | 356,99  | 2 |
| Lm_1868            | 2016.TE.6891.1.79.fsa  | 33.53 | 1,952,826 | 68  | 51  | 2,935,422 | 449,383 | 2 |
| Lm_1936            | 2016.TE.8594.1.10.fsa  | 33.32 | 3,507,926 | 139 | 102 | 3,010,565 | 294,126 | 2 |
| Lm_1943            | 2016.TE.8594.1.11.fsa  | 33.16 | 2,222,298 | 95  | 60  | 2,889,692 | 540,602 | 2 |
| Lm_1876            | 2016.TE.8594.1.12.fsa  | 33.82 | 3,717,144 | 137 | 60  | 2,985,538 | 482,817 | 3 |
| Lm_1877            | 2016.TE.8594.1.13.fsa  | 33.26 | 2,429,142 | 105 | 225 | 3,028,756 | 482,817 | 3 |
| Lm_1878            | 2016.TE.8594.1.14.fsa  | 33.96 | 4,800,432 | 161 | 121 | 2,999,846 | 481,413 | 3 |
| Lm_1879            | 2016.TE.8594.1.15.fsa  | 33.87 | 3,877,522 | 142 | 68  | 2,972,547 | 566,621 | 3 |
| Lm_1880            | 2016.TE.8594.1.16.fsa  | 33.89 | 3,933,478 | 136 | 99  | 3,077,371 | 479,525 | 3 |
| Lm_1881            | 2016.TE.8594.1.17.fsa  | 33.96 | 4,363,138 | 151 | 47  | 2,894,234 | 434,414 | 3 |
| Lm_1882            | 2016.TE.8594.1.18.fsa  | 34.11 | 3,247,418 | 99  | 100 | 3,086,621 | 431,753 | 3 |
| Lm_1883            | 2016.TE.8594.1.19.fsa  | 33.6  | 3,936,462 | 153 | 205 | 3,053,904 | 505,536 | 3 |
| Lm_1955            | 2016.TE.8594.1.2.fsa   | 34.05 | 5,651,654 | 180 | 77  | 3,017,824 | 509,117 | 3 |
| Lm_1884            | 2016.TE.8594.1.20.fsa  | 33.55 | 3,826,672 | 154 | 59  | 3,014,033 | 509,119 | 3 |
| Lm_1885            | 2016.TE.8594.1.21.fsa  | 33.19 | 1,971,426 | 85  | 63  | 3,045,866 | 429,54  | 4 |
| Lm_1886            | 2016.TE.8594.1.22.fsa  | 33.14 | 2,419,094 | 101 | 59  | 3,044,510 | 429,594 | 4 |
| Lm_1887            | 2016.TE.8594.1.23.fsa  | 33.11 | 3,059,626 | 128 | 100 | 3,055,720 | 429,594 | 4 |
| Lm_1888            | 2016.TE.8594.1.24.fsa  | 33.82 | 4,869,248 | 177 | 306 | 3,062,594 | 357,44  | 2 |
| Lm_1889            | 2016.TE.8594.1.25.fsa  | 33.17 | 1,909,250 | 82  | 52  | 3,011,401 | 605,869 | 2 |
| Lm_1890            | 2016.TE.8594.1.26.fsa  | 33.38 | 2,677,658 | 111 | 74  | 3,036,749 | 484,925 | 3 |
| Lm_1891            | 2016.TE.8594.1.27.fsa  | 34.08 | 4,379,378 | 137 | 68  | 3,063,947 | 484,133 | 3 |
| Lm_1892            | 2016.TE.8594.1.28.fsa  | 33.6  | 3,735,040 | 136 | 57  | 2,961,573 | 357,44  | 2 |
| Lm_1872            | 2016.TE.8594.1.29.fsa  | 33.55 | 3,125,588 | 101 | 62  | 3,018,366 | 449,477 | 3 |
| Lm_1956            | 2016.TE.8594.1.3.fsa   | 33.62 | 3,511,986 | 141 | 95  | 3,109,434 | 358,803 | 4 |

|                   |                       |       |           |     |     |           |         |   |
|-------------------|-----------------------|-------|-----------|-----|-----|-----------|---------|---|
| Lm_1873           | 2016.TE.8594.1.30.fsa | 34.04 | 3,041,014 | 93  | 64  | 2,998,313 | 476,295 | 3 |
| Lm_1874           | 2016.TE.8594.1.31.fsa | 33.5  | 3,273,412 | 128 | 127 | 3,116,013 | 358,802 | 4 |
| Lm_1875           | 2016.TE.8594.1.32.fsa | 33.94 | 4,157,440 | 136 | 84  | 3,104,808 | 482,291 | 3 |
| Lm_1900           | 2016.TE.8594.1.33.fsa | 33.66 | 3,168,604 | 121 | 89  | 3,100,462 | 358,802 | 4 |
| Lm_1901           | 2016.TE.8594.1.34.fsa | 33.6  | 3,540,108 | 132 | 620 | 3,244,089 | 358,802 | 4 |
| Lm_1902           | 2016.TE.8594.1.35.fsa | 33.25 | 2,813,316 | 119 | 49  | 2,908,723 | 580,306 | 2 |
| Lm_1903           | 2016.TE.8594.1.36.fsa | 33.81 | 4,710,798 | 168 | 84  | 2,990,627 | 540,999 | 2 |
| Lm_1904           | 2016.TE.8594.1.37.fsa | 33.12 | 1,991,218 | 84  | 67  | 2,967,112 | 299,173 | 2 |
| Lm_1905           | 2016.TE.8594.1.38.fsa | 33.49 | 2,650,140 | 103 | 167 | 3,044,341 | 356,99  | 2 |
| Lm_1906           | 2016.TE.8594.1.39.fsa | 33.92 | 3,456,078 | 118 | 72  | 3,019,502 | 356,99  | 2 |
| Lm_1907           | 2016.TE.8594.1.40.fsa | 33.93 | 3,246,432 | 103 | 70  | 3,018,019 | 356,99  | 2 |
| Lm_1908           | 2016.TE.8594.1.41.fsa | 33.86 | 1,917,054 | 63  | 124 | 3,031,225 | 356,99  | 3 |
| Lm_1909           | 2016.TE.8594.1.42.fsa | 33.91 | 2,627,260 | 91  | 113 | 3,068,187 | 376,529 | 2 |
| Lm_1910           | 2016.TE.8594.1.43.fsa | 33.37 | 2,939,254 | 117 | 71  | 3,020,560 | 356,989 | 3 |
| Lm_1911           | 2016.TE.8594.1.44.fsa | 34.09 | 5,225,150 | 158 | 101 | 3,086,604 | 431,753 | 3 |
| Lm_1912           | 2016.TE.8594.1.45.fsa | 33.41 | 1,823,574 | 77  | 454 | 3,198,918 | 358,803 | 4 |
| Lm_1913           | 2016.TE.8594.1.46.fsa | 33.91 | 5,523,864 | 191 | 96  | 2,983,671 | 295,975 | 4 |
| Lm_1914           | 2016.TE.8594.1.47.fsa | 33.39 | 2,928,668 | 123 | 76  | 2,979,956 | 308,368 | 4 |
| Lm_1918           | 2016.TE.8594.1.48.fsa | 33.68 | 4,600,160 | 181 | 116 | 3,076,932 | 482,727 | 3 |
| 2016.TE.8594.1.5  | 2016.TE.8594.1.5.fsa  | 34.11 | 3,919,570 | 126 | 40  | 2,932,597 | 437,349 | 2 |
| Lm_1920           | 2016.TE.8594.1.50.fsa | 33.39 | 2,292,424 | 96  | 723 | 3,244,126 | 344,532 | 4 |
| Lm_1921           | 2016.TE.8594.1.51.fsa | 34.12 | 3,824,204 | 124 | 55  | 3,061,470 | 482,464 | 3 |
| Lm_1922           | 2016.TE.8594.1.52.fsa | 34.03 | 4,307,648 | 142 | 81  | 3,067,703 | 481,06  | 3 |
| Lm_1924           | 2016.TE.8594.1.54.fsa | 33.98 | 2,980,650 | 103 | 57  | 3,061,073 | 465,251 | 3 |
| Lm_1926           | 2016.TE.8594.1.56.fsa | 34.1  | 5,039,372 | 160 | 127 | 3,078,656 | 344,262 | 4 |
| Lm_1927           | 2016.TE.8594.1.57.fsa | 33.36 | 1,906,334 | 82  | 64  | 3,062,541 | 358,322 | 4 |
| Lm_1928           | 2016.TE.8594.1.58.fsa | 34.03 | 5,004,246 | 165 | 45  | 3,059,159 | 482,727 | 3 |
| Lm_1930           | 2016.TE.8594.1.59.fsa | 33.38 | 2,973,294 | 126 | 141 | 3,034,201 | 564,718 | 3 |
| Lm_1931           | 2016.TE.8594.1.60.fsa | 33.43 | 3,335,494 | 136 | 119 | 3,113,267 | 431,753 | 3 |
| Lm_1933           | 2016.TE.8594.1.61.fsa | 33.34 | 1,862,716 | 77  | 64  | 3,042,551 | 294,126 | 2 |
| Lm_1934           | 2016.TE.8594.1.62.fsa | 32.89 | 2,101,804 | 83  | 154 | 3,067,070 | 294,126 | 3 |
| Lm_1935           | 2016.TE.8594.1.63.fsa | 34.05 | 4,107,590 | 125 | 61  | 3,000,428 | 294,126 | 2 |
| Lm_1937           | 2016.TE.8594.1.64.fsa | 34.04 | 3,740,640 | 112 | 63  | 3,042,414 | 294,126 | 2 |
| Lm_1938           | 2016.TE.8594.1.65.fsa | 34.01 | 3,242,648 | 103 | 77  | 2,974,254 | 262,424 | 2 |
| Lm_1939           | 2016.TE.8594.1.66.fsa | 34.15 | 3,032,410 | 95  | 82  | 3,074,215 | 481,38  | 3 |
| Lm_1940           | 2016.TE.8594.1.67.fsa | 33.18 | 2,350,758 | 97  | 92  | 3,107,778 | 307,644 | 4 |
| Lm_1941           | 2016.TE.8594.1.68.fsa | 33.98 | 4,343,402 | 142 | 61  | 3,100,318 | 482,801 | 3 |
| Lm_1942           | 2016.TE.8594.1.69.fsa | 33.6  | 2,499,532 | 96  | 64  | 3,100,133 | 482,429 | 3 |
| 2016.TE.8594.1.70 | 2016.TE.8594.1.70.fsa | 33.69 | 3,898,756 | 147 | 207 | 3,161,174 | 358,181 | 4 |
| Lm_1944           | 2016.TE.8594.1.71.fsa | 33.45 | 3,234,282 | 130 | 157 | 3,117,503 | 431,752 | 3 |
| Lm_1945           | 2016.TE.8594.1.72.fsa | 33.25 | 2,101,106 | 83  | 113 | 3,075,044 | 356,99  | 2 |
| Lm_1946           | 2016.TE.8594.1.73.fsa | 33.18 | 2,057,446 | 83  | 134 | 3,080,721 | 357,182 | 2 |
| Lm_1917           | 2016.TE.8594.1.74.fsa | 33.25 | 2,284,278 | 98  | 105 | 3,109,227 | 482,505 | 3 |

|                   |                       |       |           |    |    |           |           |   |
|-------------------|-----------------------|-------|-----------|----|----|-----------|-----------|---|
| Lm_1947           | 2016.TE.8594.1.9.fsa  | 33.2  | 1,621,580 | 65 | 53 | 3,039,033 | 261,325   | 2 |
| Lm_1981           | 2016.TE.9198.1.24.fsa | 33.15 | 1,272,262 | 44 | 28 | 2,992,761 | 262,448   | 3 |
| Lm_1982           | 2016.TE.9198.1.25.fsa | 32.97 | 1,500,928 | 52 | 62 | 3,001,267 | 262,447   | 2 |
| 2020.TE.88968.1.2 | 2020.TE.88968.1.2.fsa | 36.8  | 1,513,740 | 75 | 42 | 3,100,088 | 482,067   | 3 |
| Lm_1923           | 2020.TE.88968.1.3.fsa | 36.77 | 1,268,386 | 63 | 29 | 3,056,186 | 465,338   | 3 |
| Lm_1973           | 2020.TE.88968.1.4.fsa | 36.78 | 1,452,784 | 72 | 21 | 2,846,401 | 1,464,595 | 1 |
| 2020.TE.88968.1.5 | 2020.TE.88968.1.5.fsa | 36.78 | 1,250,626 | 62 | 47 | 3,098,667 | 480,32    | 3 |
| 2020.TE.88968.1.6 | 2020.TE.88968.1.6.fsa | 36.78 | 1,736,240 | 86 | 46 | 3,099,491 | 482,504   | 3 |
| Lm_1999           | 2020.TE.88968.1.7.fsa | 36.78 | 1,238,390 | 61 | 48 | 3,098,775 | 480,726   | 3 |
