# Supplementary material for: Intensive Environmental Surveillance Plan for Listeria monocytogenes in Food Producing Plants and Retail Stores of Central Italy: Prevalence and Genetic Diversity
Source: MDPI journal article supplement (doi:10.3390/foods10081944), 2021-08-20
Supplement: s1 [file s1]

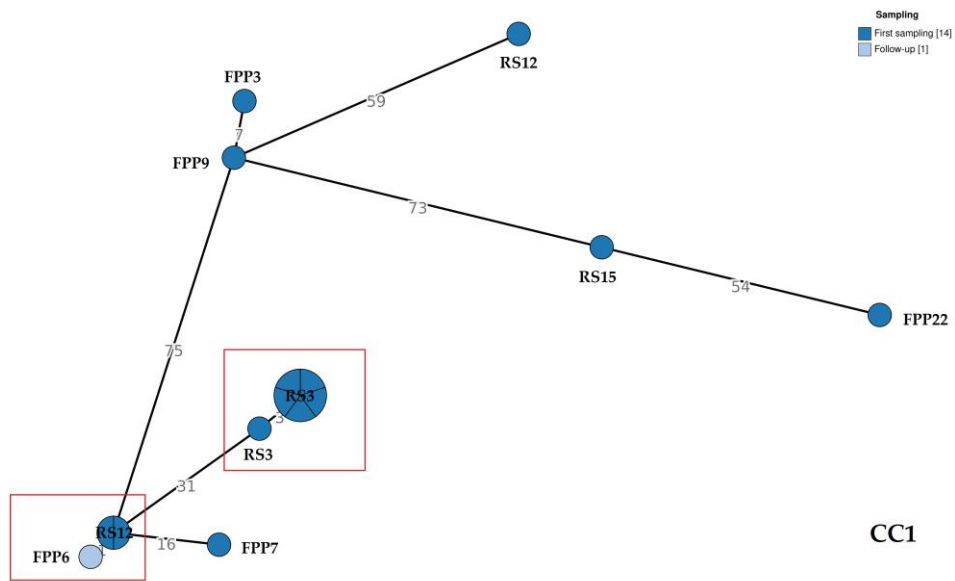

**Figure S3.** Minimum Spanning Tree (MST) based on the cgMLST profiles of CC1 *Lm* strains coloured according to sampling session; the cgMLST clusters containing more than two strains are highlighted in red.

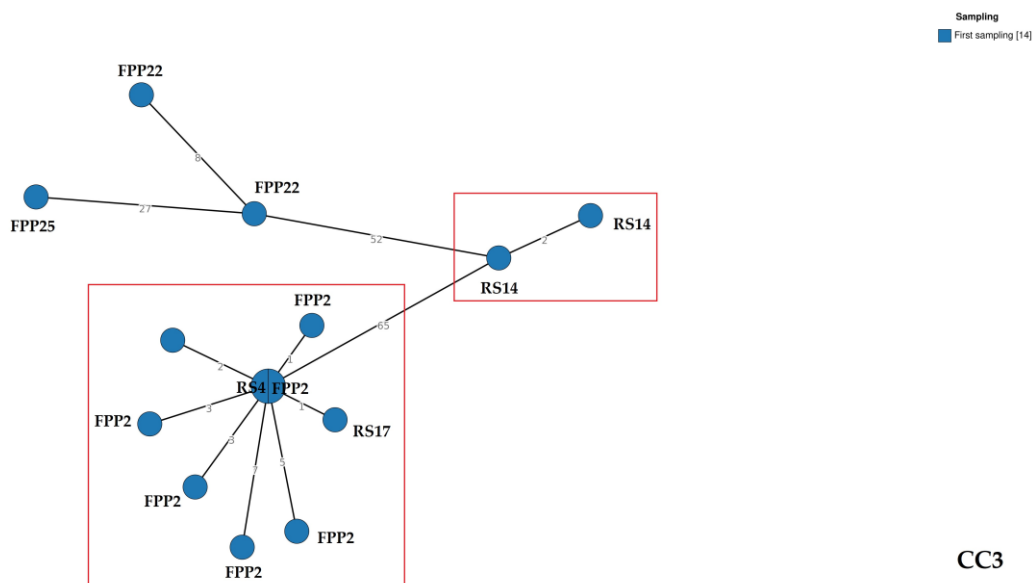

**Figure S4.** Minimum Spanning Tree (MST) based on the cgMLST profiles of CC3 *Lm* strains coloured according to sampling session; the cgMLST clusters containing more than two strains are highlighted in red.

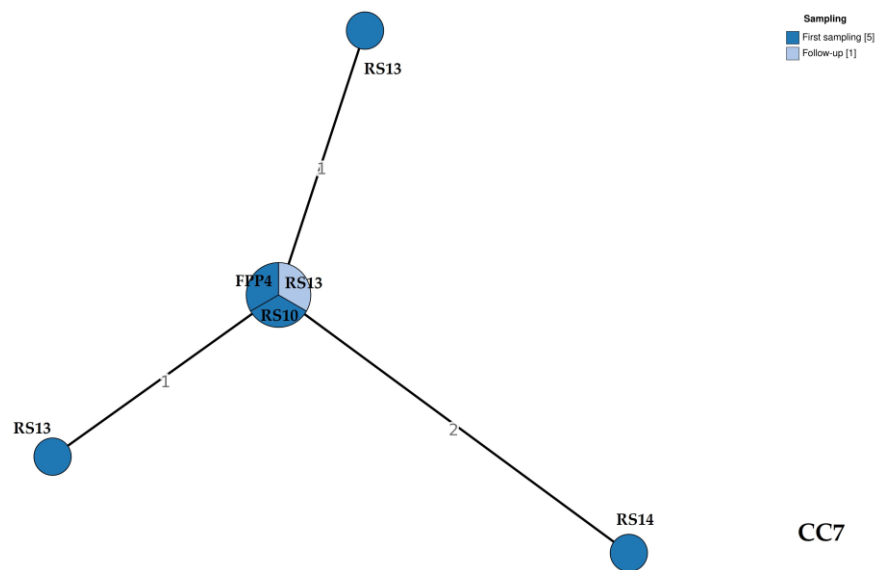

**Figure S5.** Minimum Spanning Tree (MST) based on the cgMLST profiles of CC7 *Lm* strains coloured according to sampling session; All the strains belonged to the same cgMLST cluster
