# Supplementary material for: Intensive Environmental Surveillance Plan for Listeria monocytogenes in Food Producing Plants and Retail Stores of Central Italy: Prevalence and Genetic Diversity
Source: MDPI journal article supplement (doi:10.3390/foods10081944), 2021-08-20
Supplement: s1 [file s1]

**Table S2.** List of sampled surfaces grouped into five categories.

| Surface category   | sampled surfaces                                                          |
|--------------------|---------------------------------------------------------------------------|
| Equipment          | industrial cupboards/shelves/drawers                                      |
|                    | basins/baskets                                                            |
|                    | carts                                                                     |
|                    | baldresca/containers                                                      |
|                    | waste/processing waste containers                                         |
|                    | meat cart containers                                                      |
|                    | meat hanger trolleys/racks for hanging sausages                           |
|                    | hooking bars                                                              |
|                    | hooks                                                                     |
|                    | cookware                                                                  |
|                    | hams holders                                                              |
|                    | pushbuttons/keyboards/control panels/switches                             |
|                    | cutting boards                                                            |
|                    | working/packing tables                                                    |
|                    | trays/dishes                                                              |
| Industrial systems | air intake systems/cooker hoods                                           |
|                    | air conditioning systems                                                  |
|                    | cooling systems for cold rooms/blast chillers/refrigerators               |
|                    | cooling systems for refrigerated exhibitors/exhibitor mural refrigerators |
|                    | sinks                                                                     |
|                    | drain channels                                                            |
|                    | drain wells                                                               |
|                    | cold rooms                                                                |
|                    | drying rooms                                                              |
|                    | seasoning rooms                                                           |
|                    | goods lifts                                                               |
|                    | walls                                                                     |
|                    | floors                                                                    |
|                    | door/door handles                                                         |
|                    | food wormers                                                              |
| Machines           | pipes                                                                     |
|                    | slicers                                                                   |
|                    | scales                                                                    |
|                    | packaging machines                                                        |
|                    | meat-bone separators                                                      |
|                    | labeling machines                                                         |
|                    | ovens/cooking boilers                                                     |
|                    | grater machines                                                           |
|                    | pressure washers                                                          |
|                    | kneaders                                                                  |
|                    | sausage stuffers                                                          |
|                    | meat tenderizers                                                          |
|                    | meat tying machines                                                       |
|                    | centrifugal fans                                                          |
|                    | conveyors belts                                                           |
|                    | bone saws/band saws                                                       |
|                    | meat injector machines                                                    |
|                    | knives sterilizers                                                        |
|                    | meat grinders                                                             |
| Clothing           | cut resistant gloves stainless steel                                      |
|                    | apron                                                                     |
|                    | gloves                                                                    |
|                    | boots/shoes                                                               |
| Cleaning Tools     | water tube                                                                |
| Tools              | knife sharpeners                                                          |
|                    | Can openers                                                               |
|                    | knives                                                                    |
|                    | spoons/ladles/scoops/strainers                                            |
|                    | forks                                                                     |
|                    | tongs                                                                     |
|                    | salami prickers                                                           |
