# Supplementary material for: Intensive Environmental Surveillance Plan for Listeria monocytogenes in Food Producing Plants and Retail Stores of Central Italy: Prevalence and Genetic Diversity
Source: Foods. 2021 Aug 20;10(8):1944. doi: 10.3390/foods10081944 (PMC8392342; doi:10.3390/foods10081944)
Supplement: Supplementary file 1 [file foods-10-01944-s001.zip]

Archive with 6 entries (6 files):
- figures-supplementary.pdf
- Table_S1.pdf
- Table_S2.pdf
- Table_S3_final_proof.pdf
- Table_S4.pdf
- Table_S5_noAcc.pdf
